# Supplementary material
Source: PubMed Central journal article supplement (PMC3268815)
Supplement: NIHMS275550-supplement-1.pdf [file NIHMS275550-supplement-1.pdf]

1. Supplementary Information

The file contains Supplementary Table 1 and Supplementary Figures 1-7.

2. Supplementary Movie 1

The movie shows the M1-Fg network in surface representation (M1 in red, Fg in blue).
