# Supplementary material
Source: PubMed Central journal article supplement (PMC3268815)
Supplement: NIHMS275550-supplement-4.pdf [file NIHMS275550-supplement-4.pdf]

# Editorial checklist for Nature Biology Articles

Manuscript number: 2010-08-10266D Author name: Partho Ghosh  
Title: How streptococcal M1 protein constructs a pathological fibrinogen network

**These points are additional to those in the downloadable checklist for production, at [http://mts-nature.nature.com/letters/ms\\_checklist.pdf](http://mts-nature.nature.com/letters/ms_checklist.pdf). Please note that we cannot accept your paper unless you have completed and returned BOTH checklists and confirmed that your manuscript meets all of the relevant criteria.**

## 1. Formatting

Please confirm that all of the following points are correctly formatted in your manuscript.

|                                                                                                                                                                                                                                                 |             |
|-------------------------------------------------------------------------------------------------------------------------------------------------------------------------------------------------------------------------------------------------|-------------|
|                                                                                                                                                                                                                                                 | Yes         |
| The paper is within the 5 page length limit for Articles (Please use the macro to help you determine the length of your paper.)                                                                                                                 | Yes         |
| The methods summary is less than 300 words and the full methods are provided in the SAME word document as the main text, after the figure legends (the numbering of references in the full methods section continues from the main references.) | Yes         |
| All error bars are defined in the figure legends.                                                                                                                                                                                               | N/A         |
| The $n$ is noted in all figure legends, where appropriate.                                                                                                                                                                                      | N/A         |
| Figures do not contain tables as sub-panels. (Tables should be provided as separate display items.)                                                                                                                                             | They do not |
| Where possible the SI is combined and submitted as a single PDF.                                                                                                                                                                                | Yes         |
| No more than 10 SI files (including sound/movie files) are submitted. Each individual file (including combined, single PDFs) is not larger than 30MB and the cumulative size of the files is not larger than 150MB.                             | Yes         |
| The figure legends in the SI are displayed under the individual figures.                                                                                                                                                                        | Yes         |

## 2. Special considerations

Please confirm that your manuscript meets each of the relevant criteria below, by ticking either “yes” or “not applicable”.

|                                                                                                                                                         |                      |     |
|---------------------------------------------------------------------------------------------------------------------------------------------------------|----------------------|-----|
|                                                                                                                                                         | Yes                  | N/A |
| RNAi: all small RNA sequences are provided.                                                                                                             |                      | N/A |
| Microarrays: data are in MIAME format.                                                                                                                  |                      | N/A |
| Characterization (including structure) is provided for small molecules.                                                                                 |                      | N/A |
| Protein structures: <i>Nature</i> standard table has been used for X-ray crystallography/NMR data.                                                      | Yes                  |     |
| Accession numbers are provided for microarray/protein sequence/gene sequences.                                                                          | PDB numbers provided |     |
| Human studies: informed consent and approval statement provided.                                                                                        |                      | N/A |
| Animal studies: approval statement provided.                                                                                                            |                      | N/A |
| Animal studies: details of sex, husbandry, housing and other characteristics are provided, where they are likely to influence the experimental results. |                      | N/A |
